# Supplementary material
Source: publisher figshare collection journal article supplement (https://rs.figshare.com/ndownloader/files/11768459)
Supplement: Supplementary file 1 [file 11768459]

### SI Table 3. Predicted critical load for the unworn teeth of *Sphenodon*. Three unworn dentary teeth are used from specimen SAMA 70524. Toughness of tuatara enamel is reported to range between 210000 and 32000 [38]. The lower bound relates to radial cracks, an enamel toughness of 210000, and an enamel thickness of 0.11 mm whereas the upper bound relates to marginal cracks, an enamel toughness of 320000, and an enamel thickness of 0.13 mm [37, 38]. Colours correspond to those used in SI Figure 2.

| **Tooth** | **crack type** | **enamel thickness** | **mesiodistal tooth dimension (mm)** | **labiolingual dimension (mm)** | **diameter of the tooth (m)** | **h/R** | **constant** | **crown radius (m)** | **Enamel toughness (N m1.5)** | **predicted critical load (N)** |
| --- | --- | --- | --- | --- | --- | --- | --- | --- | --- | --- |
| SAMA 70524.L2 | radial | 0.11 | 1.87 | 1.64 | 0.001755 | 1.95 | 17 | 0.00088 | 210000 | **33** |
| SAMA 70524.R1 | radial | 0.11 | 1.74 | 1.82 | 0.00178 | 2.32 | 20 | 0.00089 | 210000 | 39 |
| SAMA 70524.R2 | radial | 0.11 | 2.02 | 1.90 | 0.00196 | 2.28 | 19.5 | 0.00098 | 210000 | 42 |
| SAMA 70524.L2 | radial | 0.13 | 1.87 | 1.64 | 0.001755 | 1.95 | 17 | 0.00088 | 210000 | 36 |
| SAMA 70524.R1 | radial | 0.13 | 1.74 | 1.82 | 0.00178 | 2.32 | 20 | 0.00089 | 210000 | 43 |
| SAMA 70524.R2 | radial | 0.13 | 2.02 | 1.90 | 0.00196 | 2.28 | 19.5 | 0.00098 | 210000 | 46 |
| SAMA 70524.L2 | radial | 0.11 | 1.87 | 1.64 | 0.001755 | 1.95 | 17 | 0.00088 | 320000 | 50 |
| SAMA 70524.R1 | radial | 0.11 | 1.74 | 1.82 | 0.00178 | 2.32 | 20 | 0.00089 | 320000 | 60 |
| SAMA 70524.R2 | radial | 0.11 | 2.02 | 1.90 | 0.00196 | 2.28 | 19.5 | 0.00098 | 320000 | 64 |
| SAMA 70524.L2 | radial | 0.13 | 1.87 | 1.64 | 0.001755 | 1.95 | 17 | 0.00088 | 320000 | 54 |
| SAMA 70524.R1 | radial | 0.13 | 1.74 | 1.82 | 0.00178 | 2.32 | 20 | 0.00089 | 320000 | 65 |
| SAMA 70524.R2 | radial | 0.13 | 2.02 | 1.90 | 0.00196 | 2.28 | 19.5 | 0.00098 | 320000 | 70 |
| SAMA 70524.L2 | margin | 0.11 | 1.87 | 1.64 | 0.001755 | 1.95 | 34 | 0.00088 | 210000 | 66 |
| SAMA 70524.R1 | margin | 0.11 | 1.74 | 1.82 | 0.00178 | 2.32 | 42 | 0.00089 | 210000 | 82 |
| SAMA 70524.R2 | margin | 0.11 | 2.02 | 1.90 | 0.00196 | 2.28 | 40 | 0.00098 | 210000 | 86 |
| SAMA 70524.L2 | margin | 0.13 | 1.87 | 1.64 | 0.001755 | 1.95 | 34 | 0.00088 | 210000 | 71 |
| SAMA 70524.R1 | margin | 0.13 | 1.74 | 1.82 | 0.00178 | 2.32 | 42 | 0.00089 | 210000 | 90 |
| SAMA 70524.R2 | margin | 0.13 | 2.02 | 1.90 | 0.00196 | 2.28 | 40 | 0.00098 | 210000 | 94 |
| SAMA 70524.L2 | margin | 0.11 | 1.87 | 1.64 | 0.001755 | 1.95 | 34 | 0.00088 | 320000 | 100 |
| SAMA 70524.R1 | margin | 0.11 | 1.74 | 1.82 | 0.00178 | 2.32 | 42 | 0.00089 | 320000 | 125 |
| SAMA 70524.R2 | margin | 0.11 | 2.02 | 1.90 | 0.00196 | 2.28 | 40 | 0.00098 | 320000 | 132 |
| SAMA 70524.L2 | margin | 0.13 | 1.87 | 1.64 | 0.001755 | 1.95 | 34 | 0.00088 | 320000 | 109 |
| SAMA 70524.R1 | margin | 0.13 | 1.74 | 1.82 | 0.00178 | 2.32 | 42 | 0.00089 | 320000 | 136 |
| SAMA 70524.R2 | margin | 0.13 | 2.02 | 1.90 | 0.00196 | 2.28 | 40 | 0.00098 | 320000 | **143** |
